# Supplementary material for: Harnessing the Power of Artificial Intelligence to Enhance Next-Generation Cybersecurity
Source: Preprints.org preprint supplement (doi:10.20944/preprints202408.0763.v1), 2024-08-13
Supplement: Supplementary file 1 [file supplementary]

**Author Declarations**

**Competing Interests**

Author declares no competing or conflict of interests.

**Funding Source**

This research did not receive any specific grant from funding agencies in the public, commercial, or not-for-profit sectors.

**Author Contributions**

ST designed the study, conducted the research, collected and analyzed the data, and wrote the manuscript. ST read and approved the final manuscript.

**Availability of data and materials**

Data sharing is not applicable to this article as no datasets were generated or analyzed during the current study.

**Acknowledgements**

Without the unwavering support and guidance of my mentor, I would not have been able to complete my research to the high standard I was aiming for. Throughout the process, Chris generously shared his time and expertise providing critical feedback that challenged me to strengthen my arguments and delve deeper into the research. His insightful suggestions were instrumental in helping me push myself to do my best work.

**Authors’ information**

ST is currently employed as a research scientist at a leading financial institution in the United States where I specialize in the field of cybersecurity.  Besides working as a research scientist, ST pursuing a Ph.D. in Information Technology with a concentration in Information Systems Security.  ST also holds a distinguished Master's degree in Computer Science with honors conferred by Oklahoma City University (OKCU).
